# Supplementary material
Source: MDPI journal article supplement (https://www.mdpi.com/2073-4395/14/8/1604)
Supplement: s1 [file agronomy-3055794-supplementary.pdf › agronomy-3055794-supplementary.pdf]

# **Comparative transcriptomic analysis reveals the involvement of auxin signaling in the heat tolerance of pakchoi under high-temperature stress**

Bing Yang<sup>1,2,†</sup>, Yaosong Chen<sup>1,†</sup>, Xiaofeng Li<sup>1</sup>, Lu Gao<sup>1</sup>, Liming Miao<sup>1</sup>, Yishan Song<sup>2</sup>, Dingyu Zhang<sup>1,\*</sup> and Hongfang Zhu<sup>1,\*</sup>

<sup>1</sup>Shanghai Key Laboratory of Protected Horticultural Technology, Horticultural Research Institute, Shanghai Academy of Agricultural Sciences, Shanghai, 201403, China

<sup>2</sup>College of Food Science and Technology, Shanghai Ocean University, Shanghai 201306, China

\*Corresponding author: zhangdy1225@126.com (Dingyu Zhang); zhuhongfang@saas.sh.cn (Hongfang Zhu).

<sup>†</sup>These authors contributed equally.

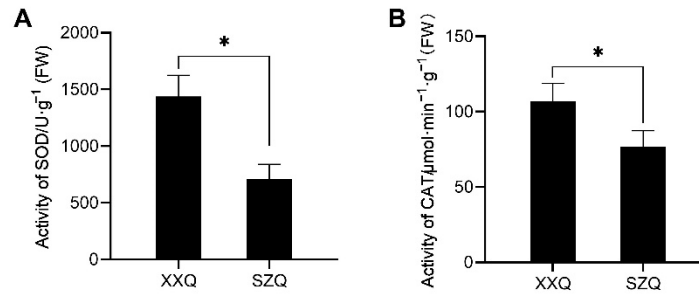

**Figure S1 SOD and CAT activities in SZQ and XXQ after high-temperature treatment**

Processing temperature: 42 °C. Processing time: 6h. Data are means ± SD (n = 3 biological replicates), \*P < 0.05 (*t*-test).

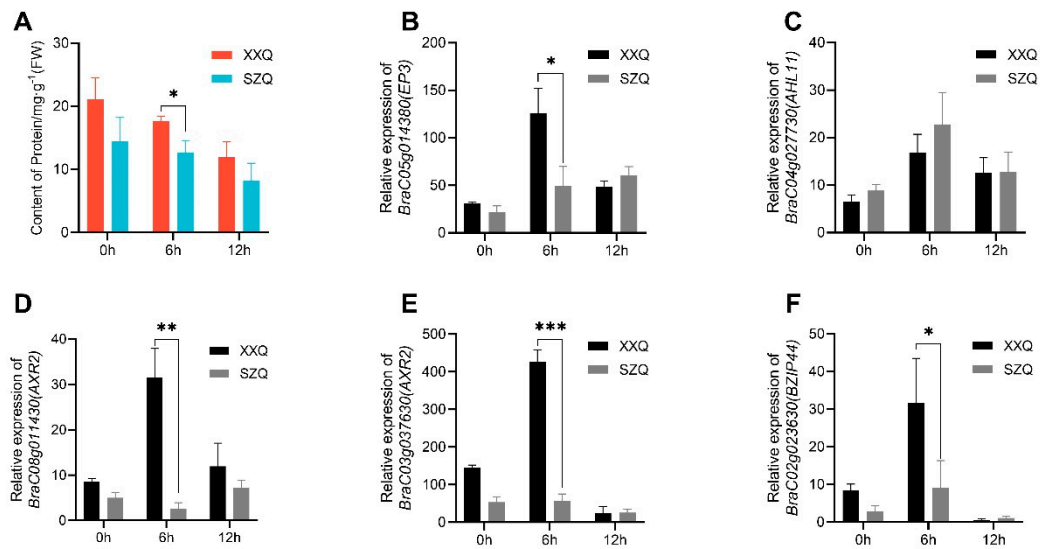

**Figure S2 Protein content and expression level of nitrogen metabolism-related genes in XXQ and SZQ during high-temperature treatment.**

(A) Protein content in XXQ and SZQ during high temperature treatment. (B-F) Expression level of nitrogen metabolism-related genes in XXQ and SZQ during high temperature treatment. High temperature treatment: 42 °C; Data are means ± SD (*n* = 3 biological replicates), \*P < 0.05, \*\*P < 0.01, \*\*\*P < 0.001 (*t*-test).

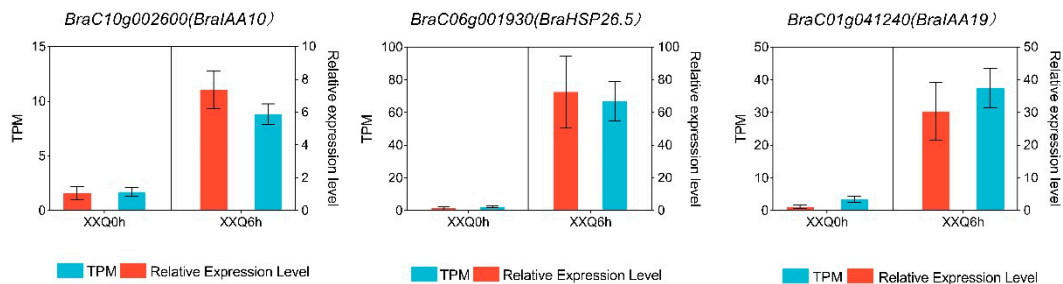

**Figure S3. Comparison of gene expression patterns between RNA-seq and qRT-PCR results.**

Data are means  $\pm$  SD ( $n = 3$  biological replicates). Primers were listed in Table S2.

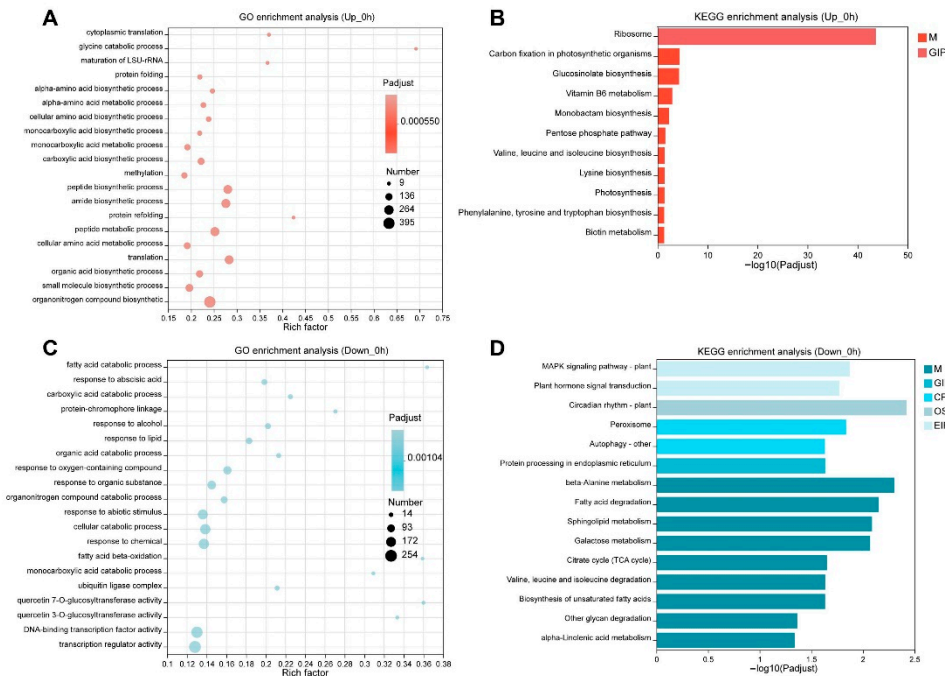

**Figure S4. Analysis of the transcriptional differences between XXQ and SZQ under normal conditions**

(A-B) GO and KEGG analysis of the upregulated differentially expressed genes between XXQ and SZQ; (C-D) GO and KEGG analysis of the downregulated differentially expressed genes between XXQ and SZQ; Data are means  $\pm$  SD ( $n = 3$  biological replicates).

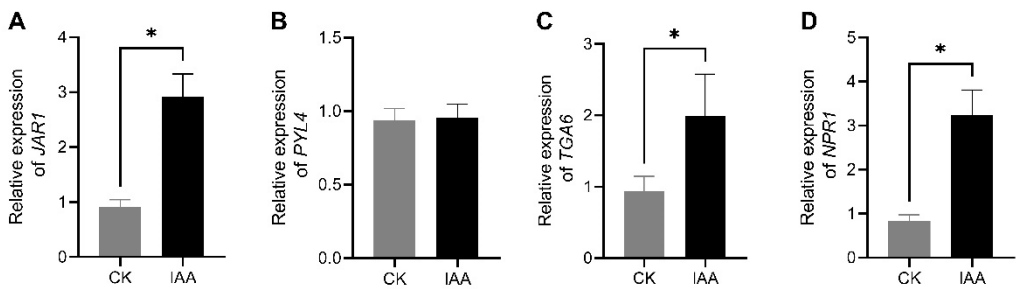

**Figure S5 Phytohormone-related gene expression pattern in response to IAA under high-temperature treatment**

High temperature treatment: 42 °C for 2 day; IAA concentration: 250  $\mu$ M/L. Data are means  $\pm$  SD ( $n = 3$  biological replicates), \*P < 0.05 ( $t$ -test).

**Table S1. Statistical sequence alignment between our sequencing results and the**

**reference genome (A represents Xinxiaqing, B represents Suzhouqing).**

| Sample  | Total reads | Total mapped       | Multiple mapped   | Uniquely mapped    | Q20(%) | Q30(%) | GC content(%) |
|---------|-------------|--------------------|-------------------|--------------------|--------|--------|---------------|
| ckA0h_1 | 43,166,518  | 38,578,277(89.37%) | 1,972,634(4.57%)  | 36,605,643(84.8%)  | 97.2   | 92.15  | 47.76         |
| ckA0h_2 | 44,667,918  | 39,980,488(89.51%) | 1,814,735(4.06%)  | 38,165,753(85.44%) | 96.89  | 91.41  | 47.68         |
| ckA0h_3 | 45,865,888  | 41,092,449(89.59%) | 1,859,699(4.05%)  | 39,232,750(85.54%) | 97.12  | 91.94  | 47.59         |
| ckA6h_1 | 44,412,506  | 39,532,186(89.01%) | 1,725,570(3.89%)  | 37,806,616(85.13%) | 97.01  | 91.67  | 47.8          |
| ckA6h_2 | 46,003,470  | 41,009,301(89.14%) | 1,813,918(3.94%)  | 39,195,383(85.2%)  | 97.16  | 92     | 47.72         |
| ckA6h_3 | 47,968,026  | 42,661,423(88.94%) | 2,039,864(4.25%)  | 40,621,559(84.68%) | 97.13  | 92     | 47.73         |
| ckB0h_1 | 40,970,678  | 36,637,889(89.42%) | 2,086,284(5.09%)  | 34,551,605(84.33%) | 97.05  | 91.78  | 47.6          |
| ckB0h_2 | 43,443,440  | 34,631,741(79.72%) | 7,046,762(16.22%) | 27,584,979(63.5%)  | 97.49  | 92.81  | 49.7          |
| ckB0h_3 | 42,352,646  | 37,294,956(88.06%) | 3,086,551(7.29%)  | 34,208,405(80.77%) | 97.4   | 92.55  | 48.13         |
| ckB6h_1 | 44,991,172  | 40,677,646(90.41%) | 1,820,950(4.05%)  | 38,856,696(86.37%) | 97.12  | 91.9   | 47.84         |
| ckB6h_2 | 42,811,384  | 38,702,137(90.4%)  | 17,440,23(4.07%)  | 36,958,114(86.33%) | 97.19  | 92.03  | 47.72         |
| ckB6h_3 | 42,649,434  | 37,978,812(89.05%) | 1,592,481(3.73%)  | 36,386,331(85.31%) | 96.19  | 89.98  | 47.32         |

**Table S2. Primer sequences were used in the present study.**

| Gene ID              | Gene name      | Forward sequence       | Reverse sequence     |
|----------------------|----------------|------------------------|----------------------|
| <i>BraC02g018670</i> | <i>HSFA8</i>   | GGTTACCGACACGAAGATGC   | TGGTGGCTGCTGGTATGTTA |
| <i>BraC08g015400</i> | <i>HSP20</i>   | ATCCGTTGGTCTCAGTCTCC   | TCACAGTCAACACACCGTCT |
| <i>BraC05g048410</i> | <i>HSFA1E</i>  | TGGGAATTTGCAAACGAGGG   | CTCTTGGGTGAGGACGTTCT |
| <i>BraC02g029130</i> | <i>HIP1</i>    | GGAGGAGGAGAGGGAGAAGA   | TCTCTGCCTCTCTCAACAGC |
| <i>BraC09g060570</i> | <i>HSFA7B</i>  | TGATGTCTTTCCTGAGGCGT   | TCGTCGAGTTCCTTCTCCAC |
| <i>BraC06g001930</i> | <i>HSP26.5</i> | AAGCTGAGGTACGAGGTTCC   | CACACCGTTCTTGAGTTCCG |
| <i>BraC10g002600</i> | <i>IAA10</i>   | TGAAGCCTTGCGCAAAACAT   | CAGTCTTTTCACGCACCCAA |
| <i>BraC01g041240</i> | <i>IAA19</i>   | CGGAGCTGAGACTTGGACTION | CACCACCTGAGTTTTCACCG |
| <i>BraC05g001840</i> | <i>JAR1</i>    | GCCGTCCAAAGTTTGTTCCT   | TCTCATCCCGGCTTTGAAGT |
| <i>BraC01g011050</i> | <i>NPR1</i>    | GCGGAGATCACATTCTGAAGG  | CGCAAGTGGAACCTCAACA  |
| <i>BraC04g029110</i> | <i>PYL4</i>    | TTCAAGAAATCTCCGCCCT    | GACATGCCTCTCGTCGTCTA |
| <i>BraC05g041370</i> | <i>TGA6</i>    | GTTCCGCTCATCCGAACTTC   | TGGCCATCTGACCCATGTAG |
